# Supplementary material for: Screening of healthcare workers for SARS-CoV-2 highlights the role of asymptomatic carriage in COVID-19 transmission
Source: eLife journal article supplement (doi:10.7554/elife.58728), 2020-05-11
Supplement: supp [file elife-58728-supp-v1.zip]

Archive with 5 entries (5 files):
- elife_poa_e58728_Figure_1_figure_supplement_1.pdf
- elife_poa_e58728_Figure_4_figure_supplement_1.pdf
- elife_poa_e58728_Figure_4_figure_supplement_2.pdf
- elife_poa_e58728_Source_data_1.xlsx
- elife_poa_e58728_Transparent_Reporting_File.docx
