# Supplementary material for: Screening of healthcare workers for SARS-CoV-2 highlights the role of asymptomatic carriage in COVID-19 transmission
Source: eLife journal article supplement (doi:10.7554/elife.58728), 2020-05-11
Supplement: supp [file elife-58728-supp-v1.zip › elife_poa_e58728_Figure_1_figure_supplement_1.pdf]

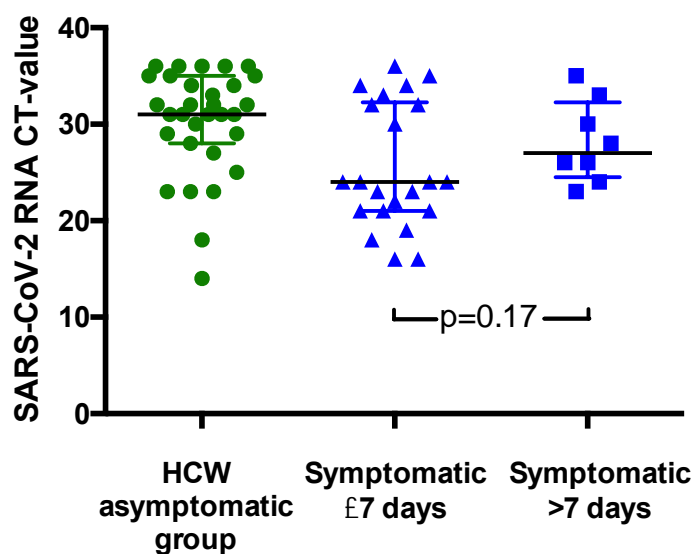

**Figure 1–figure supplement 1: SARS-CoV-2 RNA CT values for HCWs testing positive according to presence and duration of symptoms.** Results from the HCW symptomatic and HCW symptomatic contact groups are considered together in this figure. Individual CT values are shown, along with median and interquartile range for each group.
