# Supplementary material for: Screening of healthcare workers for SARS-CoV-2 highlights the role of asymptomatic carriage in COVID-19 transmission
Source: eLife journal article supplement (doi:10.7554/elife.58728), 2020-05-11
Supplement: supp [file elife-58728-supp-v1.zip › elife_poa_e58728_Figure_4_figure_supplement_1.pdf]

A.

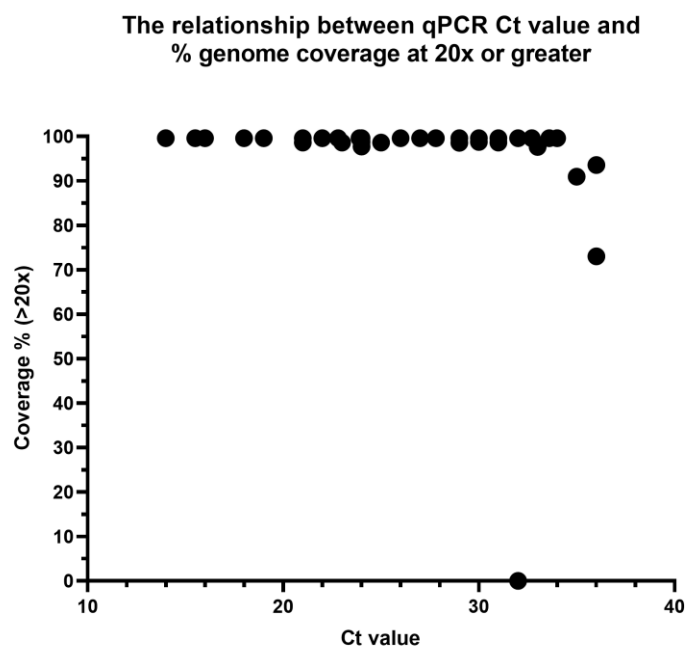

B.

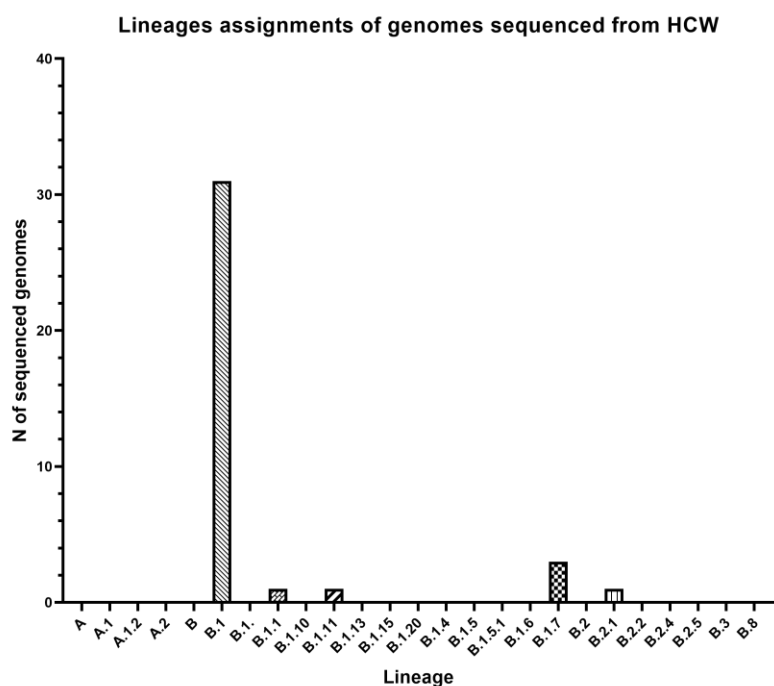

**Figure 4—figure supplement 1. Further details of sequencing data.**

- A) Comparisons of sequencing success rate vs Ct of HCW samples. Samples with CT less than 33 typically yielded genomes >90% coverage at a minimum depth of 20x.
- B) Lineage assignment of SARS CoV-2 genomes from HCW positive samples. Lineage assignments were generated using the PANGOLIN utility using a comparison against all currently circulating reference lineages.
