# Supplementary material for: Screening of healthcare workers for SARS-CoV-2 highlights the role of asymptomatic carriage in COVID-19 transmission
Source: eLife journal article supplement (doi:10.7554/elife.58728), 2020-05-11
Supplement: supp [file elife-58728-supp-v1.zip › elife_poa_e58728_Source_data_1.xlsx]

## Sheet: Figure 1
HCW asymptomatic group	HCW symptomatic / symptomatic household contact group
35	23
36	24
31	24
31	21
23	34
31	24
36	28
25	32
32	16
34	26
23	21
18	22
27	32
30	19
33	30
35	33
32	34
28	30
32	35
36	18
36	36
14	35
36	23
35	33
29	24
31	26
31	23
29	24
32	21
34	23
23

## Sheet: Figure 2
Central pie chart distribution of HCWs in asymptomatic screen
(i)Asymptomatic	6
(ii) ≤7 days	12
(iii) >7 days	12
Total	30
Left pie chart probability of COVID-19 based on retrospective analysis using severity criteria within those who had experienced symptoms for >7 days
High	10
Medium	1
Low	1
Right pie chart probability of COVID-19 based on retrospective analysis using severity criteria within those who had experienced symptoms for ≤7 days
High	3
Medium	2
Low	7

## Sheet: Figure 3
Ward	Tests assigned to this location	Positive tests assigned to this location	Positive tests from this location as % of all positive tests returned	Positive tests from this location as a percentage of tests performed at this location
A	26	0	0	0
B	44	1	3.57143	2.27273
C	30	0	0	0
D	38	0	0	0
E	54	1	3.57143	1.85185
F	43	4	14.2857	9.30233
G	15	0	0	0
H	12	0	0	0
I	17	0	0	0
J	31	0	0	0
K	54	3	10.7143	5.55556
L	11	0	0	0
M	35	1	3.57143	2.85714
N	20	0	0	0
O	44	4	14.2857	9.09091
P	19	0	0	0
Q	37	7	25	18.9189
R	72	3	10.7143	4.16667
S	59	1	3.57143	1.69492
T	42	2	7.14286	4.7619
U	33	1	3.57143	3.0303
Total	737	28	100	63.5032

## Sheet: Figure 4
Figure 4:
	HCW asymptomatic group	HCW symptomatic / symptomatic household contact group	Reactive screening group
F	4	2	3
Q	7	1	1

## Sheet: Figure S1
Asymptomatic group	<=7 days	> 7days
23	23	35
16	26	36
23	30	31
21	26	31
22	28	23
32	33	31
33	35	36
16	24	25
19		32
36		34
24		23
24		18
21		27
34		30
34		33
30		35
21		32
24		28
32		32
18		36
24		36
35		14
		36
		35
		29
		31
		31
		29
		32
		34
		23
